# Supplementary material
Source: Springer Nature journal article supplement (https://www.springermedizin.de/resource/supplementary/12874_2005_144_MOESM1_ESM.pdf/9433860)

## Cumulative % response among MEN

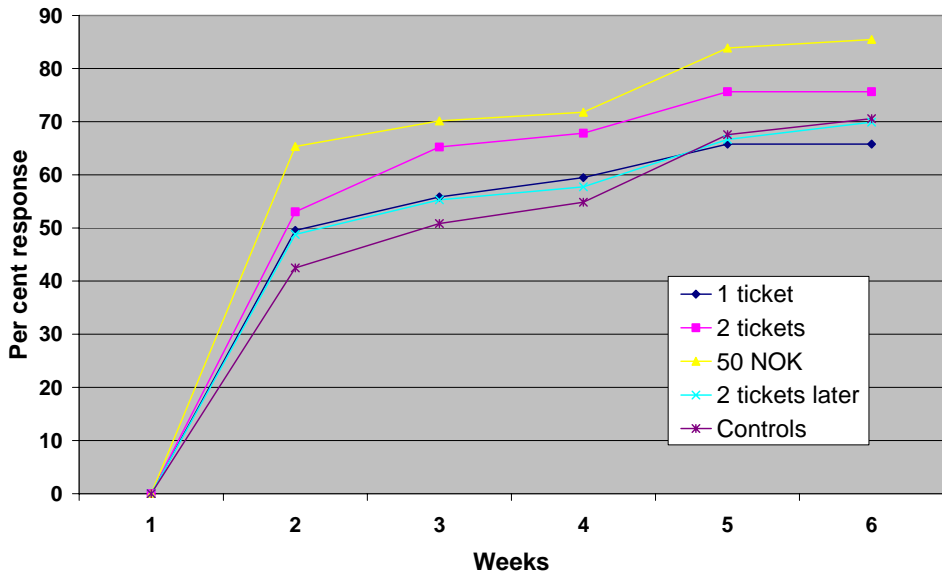

Supplement: MOESM1 [file 9433860]
